# Supplementary material for: Prognosis of Pancreatic Cancer Patients with Synchronous or Metachronous Malignancies from Other Organs Is Better than Those with Pancreatic Cancer Only
Source: PubMed Central journal article supplement — Cancer Res Treat. 2017 Dec 20;50(4):1175–85. doi: 10.4143/crt.2017.494 (PMC6192923; doi:10.4143/crt.2017.494), 2017-12-20
Supplement: crt-2017-494-suppl1.pdf [file crt-2017-494-suppl1.pdf]

**S1 Table.** Primary antibodies used in the present study

| Antibody                       | Clone         | Supplier       | Dilution |
|--------------------------------|---------------|----------------|----------|
| Cytokeratin 7                  | OV-TL 12/3    | Dako, Denmark  | 1:400    |
| Cytokeratin 20                 | Ks 20.8       | Dako, Denmark  | 1:200    |
| CDX2                           | Cdx2-88       | BioGenex, USA  | 1:200    |
| SMAD4                          | EP618Y        | Epitomics, USA | 1:100    |
| Thyroid transcription factor-1 | SPT24         | Novocastra, UK | 1:200    |
| p63                            | DAK-p63       | Dako, Denmark  | 1:200    |
| Estrogen receptor              | NCL-6F11      | Novocastra, UK | 1:50     |
| Progesterone receptor          | NCL-L-PGR-312 | Novocastra, UK | 1:200    |
| HER2                           | A0485         | Dako, Denmark  | 1:750    |
