# Supplementary material for: Prognosis of Pancreatic Cancer Patients with Synchronous or Metachronous Malignancies from Other Organs Is Better than Those with Pancreatic Cancer Only
Source: PubMed Central journal article supplement — Cancer Res Treat. 2017 Dec 20;50(4):1175–85. doi: 10.4143/crt.2017.494 (PMC6192923; doi:10.4143/crt.2017.494), 2017-12-20
Supplement: crt-2017-494-suppl6.pdf [file crt-2017-494-suppl6.pdf]

**S6 Table.** Reported accompanying other malignancies in primary pancreatic cancer patients

| Accompanying other malignancies | Kamisawa et al. [1]<br>(45/270, 16.6%) | Kasumi et al. [2]<br>(9/123, 7.3%) | Yoshimori et al. [3]<br>(12/111, 10.8%) | Makino et al. [4]<br>(134/2394, 5.6%) | Tagawa et al. [5]<br>(7/599, 1.17%) | Muller et al. [6]<br>(16/1178, 1.36%) | Eriguchi et al. [7] (12) | Total |
|---------------------------------|----------------------------------------|------------------------------------|-----------------------------------------|---------------------------------------|-------------------------------------|---------------------------------------|--------------------------|-------|
| Stomach                         | 15                                     | 5                                  | -                                       | 26                                    | -                                   | -                                     | 5                        | 51    |
| Colorectal                      | 6                                      | -                                  | 1                                       | 9                                     | -                                   | -                                     | 4                        | 20    |
| Lung                            | 3                                      | -                                  | -                                       | 10                                    | 7                                   | -                                     | 2                        | 22    |
| Thyroid                         | 9                                      | -                                  | 1                                       | 25                                    | -                                   | -                                     | -                        | 35    |
| Liver                           | 2                                      | -                                  | -                                       | 3                                     | -                                   | -                                     | -                        | 5     |
| Breast                          | 5                                      | 1                                  | -                                       | 5                                     | -                                   | -                                     | -                        | 11    |
| Bladder                         | 1                                      | -                                  | 3                                       | 4                                     | -                                   | -                                     | -                        | 8     |
| Prostate                        | 3                                      | 1                                  | 1                                       | 14                                    | -                                   | -                                     | -                        | 19    |
| Kidney                          | -                                      | -                                  | -                                       | 7                                     | -                                   | 16                                    | -                        | 23    |
| Appendix                        | -                                      | -                                  | -                                       | -                                     | -                                   | -                                     | -                        | 0     |
| Small intestine                 | -                                      | -                                  | -                                       | -                                     | -                                   | -                                     | -                        | 0     |
| CBD                             | -                                      | -                                  | -                                       | -                                     | -                                   | -                                     | -                        | 0     |
| Gallbladder                     | -                                      | -                                  | -                                       | 4                                     | -                                   | -                                     | -                        | 4     |
| Testis                          | -                                      | -                                  | -                                       | -                                     | -                                   | -                                     | -                        | 0     |
| Uterus                          | 1                                      | 1                                  | 2                                       | 9                                     | -                                   | -                                     | 1                        | 14    |
| Esophagus                       | 2                                      | -                                  | 1                                       | 2                                     | -                                   | -                                     | -                        | 5     |
| Larynx                          | 1                                      | -                                  | -                                       | 2                                     | -                                   | -                                     | -                        | 3     |
| Tonsil                          | -                                      | 1                                  | -                                       | -                                     | -                                   | -                                     | -                        | 1     |
| Salivary gland                  | -                                      | -                                  | -                                       | -                                     | -                                   | -                                     | -                        | 0     |
| Gingiva                         | 1                                      | -                                  | 1                                       | -                                     | -                                   | -                                     | -                        | 2     |
| Pharynx                         | -                                      | -                                  | 2                                       | 1                                     | -                                   | -                                     | -                        | 3     |
| Ovary                           | -                                      | -                                  | -                                       | 2                                     | -                                   | -                                     | -                        | 2     |

|          |   |   |   |   |   |   |   |   |   |
|----------|---|---|---|---|---|---|---|---|---|
| MFH      | 2 | - | - | - | - | - | - | - | 2 |
| Melanoma | 1 | - | - | - | - | - | - | - | 1 |
| MM       | - | - | - | 1 | - | - | - | - | 1 |
| AML      | 1 | - | - | - | - | - | - | - | 1 |
| CML      | 1 | - | - | 1 | - | - | - | - | 2 |
| Skin     | - | - | - | 1 | - | - | - | - | 1 |

CBD, common bile duct; MFH, malignant fibrous histiocytosis; Melanoma, malignant melanoma; MM, multiple myeloma; AML, acute myelocytic leukemia; CML, chronic myelocytic leukemia.
